# Supplementary material for: Pipeline for Analyzing Lesions After Stroke (PALS)
Source: Front Neuroinform. 2018 Sep 24;12:63. doi: 10.3389/fninf.2018.00063 (PMC6165891; doi:10.3389/fninf.2018.00063)
Supplement: Supplementary file 2 [file Table_2.DOCX]

Supplementary Material

Pipeline for Analyzing Lesions after Stroke

Kaori L. Ito1, Amit Kumar1, Artemis Zavnliangos-Petropulu1, Steven C. Cramer2, & Sook-Lei Liew1*

*** Correspondence:** Sook-Lei Liew: sliew@usc.edu

# Table S2. Simulated cases using T1 & lesion mask inputs only

| Cases | Input Orientations | Output Orientations |
| --- | --- | --- |
| Case 1 | Lesion: neurological | radiological |
| T1: neurological | radiological |
| Case 2 | Lesion: radiological | radiological |
| T1: radiological | radiological |
| Case 3 | Lesion: neurological | flagged |
| T1: radiological |
| Case 4 | Lesion: radiological | flagged |
| T1: neurological |
